# Supplementary material for: Exploring the Mechanism of Inhibition of Au Nanoparticles on the Aggregation of Amyloid-β(16-22) Peptides at the Atom Level by All-Atom Molecular Dynamics
Source: PubMed Central journal article supplement (PMC6032210; doi:10.3390/ijms19061815), 2018-06-20
Supplement: ijms-19-01815-s001.pdf [file ijms-19-01815-s001.pdf]

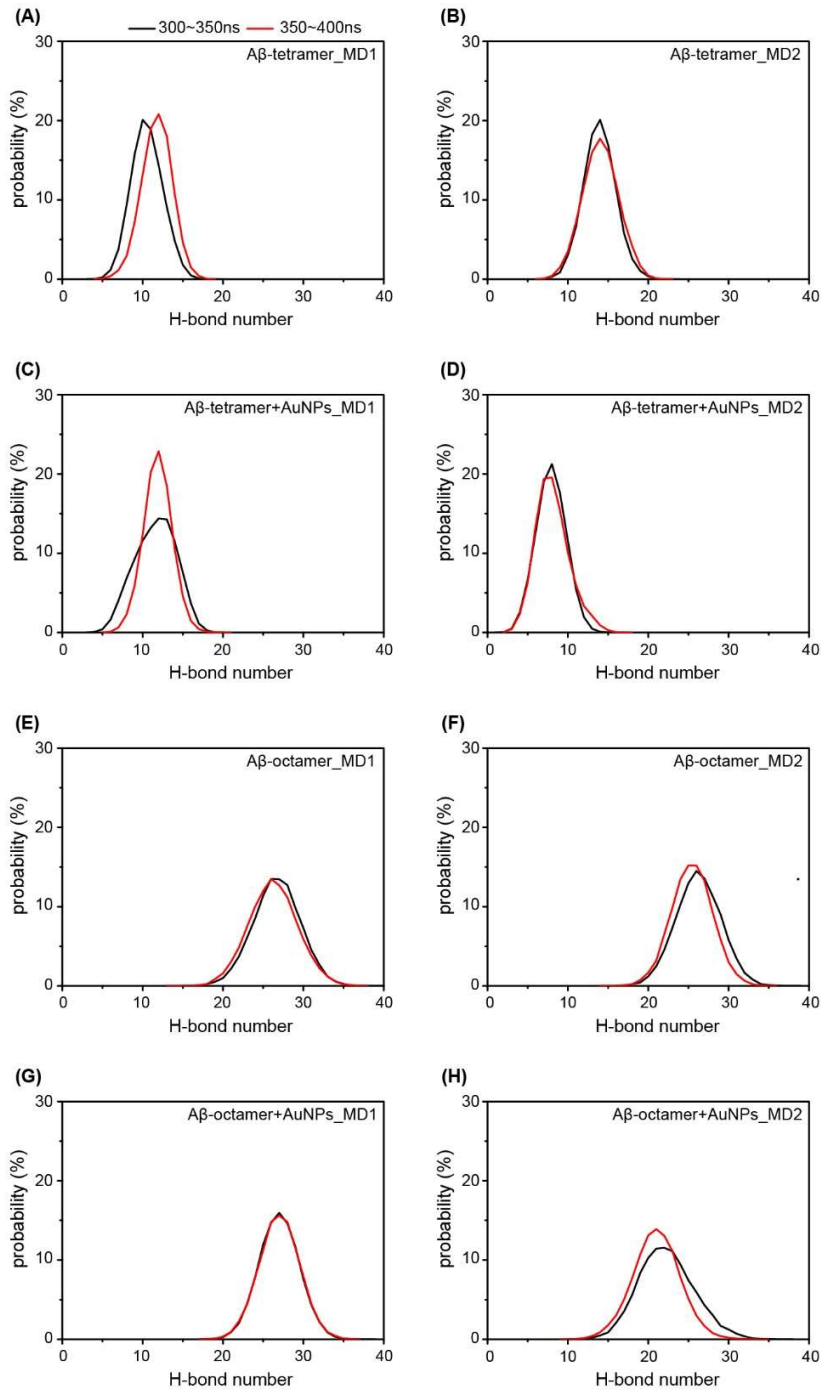

**Figure S1:** Convergence check of the REMD runs of Aβ(16-22). Probability distribution of end-to-end distance (the Ca-Ca distance between K16 and E22) of Aβ (16-22). (A) at neutral pH; (B) at acidic pH.
